# Supplementary material
Source: Elsevier journal article supplement (https://authors.library.caltech.edu/45917/13/mmc2.xlsx)
Supplement: mmc2 [file mmc2.xlsx]

## Sheet: EA1
ELECTRONIC APPENDIX TABLE EA1
MERRILLITE COMPOSITIONS IN LL CHONDRITES: ELECTRON MICROPROBE ANALYSES
										Formula on the basis of 56 oxygens
Bo Xian	CaO	MgO	FeO	Na2O	P2O5	Y2O3	Ce2O3	Total		Ca	Mg	Fe	Na	P	Y	Ce	Total		mg#
	46.247	3.392	0.654	2.649	45.606	0.021	0.051	98.625		17.9823	1.8347	0.1988	1.8641	14.0126	0.0042	0.007	35.9079		0.902238
	46.252	3.426	1.294	2.693	45.815	0.038	0.023	99.544		17.8605	1.8403	0.3899	1.8816	13.9797	0.007	0.0028	35.966		0.825173
	46.164	3.431	0.98	2.703	45.484	0	0.008	98.779		17.9501	1.8557	0.2975	1.9019	13.9748	0	0.0014	35.9884		0.861834
	46.349	3.419	0.64	2.691	45.445	0.001	0	98.547		18.0467	1.8522	0.1946	1.8963	13.9825	0	0	35.9744		0.904925
	46.4	3.449	0.678	2.782	45.554	0	0.007	98.874		18.0138	1.8627	0.2051	1.9544	13.9748	0	0.0007	36.015		0.900812
	46.373	3.412	0.563	2.732	45.492	0	0.017	98.607		18.0348	1.8459	0.1708	1.9229	13.9804	0	0.0021	35.9898		0.915307
	46.208	3.375	0.661	2.682	45.35	0	0.026	98.307		18.0376	1.8326	0.2016	1.8949	13.9888	0	0.0035	35.9632		0.900895
	46.397	3.441	0.641	2.688	45.102	0	0.047	98.321		18.1377	1.8711	0.1953	1.9019	13.9321	0	0.0063	36.0493		0.905488
	45.943	3.466	0.968	2.689	45.5	0	0	98.57		17.8857	1.8774	0.294	1.8942	13.9972	0	0	35.952		0.864603
	45.802	3.765	1.011	2.671	45.03	0.01	0	98.295		17.9088	2.0482	0.3087	1.89	13.9125	0.0021	0	36.0752		0.869023
	46.081	3.438	0.713	2.716	45.601	0	0.019	98.571		17.9228	1.8606	0.2163	1.9117	14.0154	0	0.0028	35.9324		0.895854
	46.281	3.394	0.617	2.681	45.373	0	0	98.349		18.0544	1.8417	0.1876	1.8928	13.9867	0	0	35.9667		0.907554
Mean	46.2081	3.45067	0.785	2.69808	45.446	0.00583333	0.0165	98.6157		17.9863	1.86859	0.23835	1.90056	13.9781	0.00110833	0.00221667	35.9817		0.887809
1-sigma	0.186256	0.102322	0.223629	0.0336977	0.215293	0.011976	0.0178657	0.346439		0.0821633	0.0582776	0.0673692	0.0223132	0.0295468	0.00226252	0.00242181	0.0468629		0.0267211
										Formula on the basis of 56 oxygens
Bjurbole	CaO	MgO	FeO	Na2O	P2O5	Y2O3	Ce2O3	Total		Ca	Mg	Fe	Na	P	Y	Ce	Total		mg#
	46.374	3.492	0.599	2.72	45.623	0.035	0.04	98.885		17.9926	1.88518	0.18144	1.90938	13.9875	0.00672	0.005376	35.969		0.912205
	46.223	3.684	0.588	2.881	45.167	0.028	0.035	98.611		18.0154	1.99763	0.178752	2.03168	13.9108	0.005376	0.00448	36.1478		0.917867
	46.246	3.412	0.611	2.699	45.489	0.055	0.066	98.587		18.0033	1.84755	0.185472	1.90131	13.9933	0.010752	0.00896	35.9583		0.90877
	45.93	3.588	0.604	2.824	45.34	0.035	0.057	98.379		17.9146	1.94701	0.184128	1.9936	13.9745	0.00672	0.007616	36.0291		0.913601
	44.249	3.778	0.546	3.056	44.615	0.063	0	96.33		17.5894	2.08947	0.169344	2.19834	14.0139	0.012544	0	36.0918		0.92503
	46.344	3.623	0.553	2.804	45.654	0.114	0.057	99.15		17.9411	1.95149	0.167104	1.96403	13.966	0.021952	0.007616	36.0201		0.921125
	45.937	3.54	1.142	2.705	45.302	0.049	0.068	98.753		17.8936	1.91878	0.3472	1.90669	13.944	0.009408	0.00896	36.0367		0.846777
	46.392	3.462	0.889	2.646	45.61	0.055	0.02	99.079		17.9854	1.86726	0.269248	1.85606	13.9722	0.010752	0.002688	35.9681		0.873978
	46.554	3.494	0.614	2.744	46.052	0.066	0.063	99.587		17.9258	1.87174	0.184576	1.91206	14.0121	0.012544	0.008064	35.9269		0.91024
	46.278	3.591	0.591	2.73	45.87	0.114	0.03	99.206		17.8824	1.93088	0.178304	1.90893	14.0063	0.021952	0.004032	35.9345		0.915463
	46.333	3.553	0.482	2.714	45.526	0.081	0.037	98.727		18.0029	1.92058	0.146048	1.90848	13.978	0.01568	0.004928	35.9775		0.92933
	46.772	3.458	0.407	2.705	46.088	0.1	0.056	99.586		18.002	1.85158	0.122304	1.88429	14.017	0.019264	0.007168	35.9036		0.938039
	46.826	3.435	0.38	2.685	45.892	0.062	0.064	99.345		18.0764	1.84486	0.114688	1.87533	13.9987	0.012096	0.008512	35.9314		0.941472
	46.66	3.505	0.382	2.701	45.804	0.129	0.06	99.244		18.0338	1.88474	0.115136	1.88922	13.9888	0.02464	0.008064	35.9466		0.942428
	46.266	3.448	1.121	2.674	44.858	0.11	0.043	98.526		18.1086	1.87757	0.342272	1.89414	13.8737	0.021504	0.005824	36.1285		0.845812
	47.167	3.5	0.368	2.711	46.29	0.082	0.044	100.162		18.0535	1.86368	0.110208	1.87802	14.0004	0.01568	0.005824	35.9274		0.944167
	46.887	3.527	0.364	2.694	45.782	0.13	0.049	99.438		18.0983	1.8937	0.10976	1.88205	13.9642	0.025088	0.006272	35.9834		0.945215
	46.833	3.404	0.393	2.676	45.807	0.121	0.07	99.307		18.0979	1.83008	0.11872	1.8713	13.9875	0.023296	0.009408	35.9408		0.93908
	46.537	3.493	0.449	2.7	45.199	0.067	0.086	98.531		18.1512	1.89549	0.13664	1.90579	13.9306	0.012992	0.011648	36.0443		0.93276
	46.279	3.528	1.471	2.749	45.434	0.091	0.036	99.59		17.9146	1.89997	0.444416	1.92595	13.8979	0.017472	0.004928	36.107		0.810434
mean	46.3544	3.52575	0.6277	2.7409	45.5701	0.07935	0.04905	98.9512		17.9841	1.90346	0.190288	1.92483	13.9709	0.0153216	0.0065184	35.9986		0.91069
1-sigma	0.588225	0.0924024	0.300873	0.0925282	0.413636	0.0326501	0.019779	0.771337		0.120644	0.0602674	0.0914218	0.0769747	0.040275	0.00627133	0.00264632	0.073448		0.0375237
										Formula on the basis of 56 oxygens
Tuxtuac	CaO	MgO	FeO	Na2O	P2O5	Y2O3	Ce2O3	Total		Ca	Mg	Fe	Na	P	Y	Ce	Total		mg#
	47.026	3.498	0.657	2.865	45.261	0.031	0.034	99.372		18.2309	1.88653	0.198912	2.00973	13.8652	0.006272	0.00448	36.202		0.904619
	46.912	3.439	0.59	2.776	45.606	0.001	0.041	99.365		18.1449	1.85069	0.177856	1.94298	13.9386	0.000448	0.005376	36.0609		0.912323
	47	3.478	0.474	2.816	45.559	0.025	0.072	99.427		18.1754	1.87085	0.142912	1.97075	13.9216	0.004928	0.009408	36.098		0.929032
	46.918	3.396	0.467	2.773	45.658	0.03	0.004	99.246		18.153	1.82784	0.14112	1.94118	13.9592	0.005824	0.000448	36.0286		0.928328
	46.926	3.405	0.362	2.751	45.5	0.014	0	98.958		18.2072	1.83814	0.10976	1.93178	13.9503	0.002688	0	36.0398		0.943652
	46.855	3.388	0.358	2.735	45.495	0.044	0.004	98.879		18.1919	1.83008	0.108416	1.92147	13.9579	0.008512	0.000448	36.0192		0.944072
	47.074	3.434	0.651	2.777	45.7	0.016	0	99.652		18.1597	1.84307	0.196224	1.9385	13.931	0.003136	0	36.0721		0.903779
	47.08	3.415	0.615	2.744	45.532	0.041	0	99.427		18.2112	1.8377	0.185472	1.92102	13.9171	0.008064	0	36.081		0.908326
	47.241	3.422	0.582	2.801	45.886	0.069	0	100.009		18.1588	1.83008	0.17472	1.94835	13.9373	0.012992	0	36.077		0.912849
	46.952	3.383	0.531	2.801	45.504	0.083	0.016	99.27		18.187	1.82336	0.160384	1.96358	13.9283	0.016128	0.00224	36.081		0.919151
	47.073	3.407	0.491	2.783	45.481	0.06	0	99.295		18.2296	1.83546	0.148736	1.95059	13.9176	0.011648	0	36.094		0.92504
	47.142	3.407	0.548	2.812	45.86	0.098	0.025	99.892		18.1395	1.82381	0.164416	1.95776	13.944	0.018816	0.003136	36.0515		0.917305
	47.073	3.402	0.55	2.809	45.768	0.094	0.008	99.704		18.1467	1.82426	0.165312	1.96	13.9418	0.01792	0.000896	36.0573		0.916911
	46.936	3.389	0.684	2.846	45.96	0.064	0.018	99.897		18.0508	1.81306	0.205184	1.98106	13.9673	0.012096	0.00224	36.0317		0.898335
mean	47.0149	3.41879	0.54	2.79207	45.6264	0.0478571	0.0158571	99.4566		18.1705	1.83821	0.162816	1.95277	13.9341	0.009248	0.002048	36.071		0.918837
stdev	0.105879	0.0337757	0.101441	0.0370332	0.191446	0.0307317	0.0211255	0.338875		0.0463796	0.0197721	0.0303181	0.0239359	0.0252113	0.00582428	0.00277122	0.0449986		0.0139484
										Formula on the basis of 56 oxygens
St. Severin	CaO	MgO	FeO	Na2O	P2O5	Y2O3	Ce2O3	Total		Ca	Mg	Fe	Na	P	Y	Ce	Total		mg#
	47.156	3.495	0.552	2.815	45.816	0.064	0.074	99.973		18.1382	1.86995	0.16576	1.95955	13.9256	0.012096	0.009856	36.0819		0.918574
	47.274	3.456	0.347	2.833	45.42	0.042	0.048	99.42		18.2954	1.86054	0.104832	1.98374	13.8902	0.008064	0.006272	36.1491		0.946661
	47.244	3.511	0.314	2.816	45.609	0.006	0.06	99.56		18.239	1.88563	0.094528	1.96717	13.9135	0.001344	0.008064	36.1092		0.952262
	47.351	3.422	0.379	2.819	45.523	0.031	0.065	99.59		18.2941	1.83949	0.11424	1.97075	13.8979	0.005824	0.008512	36.1308		0.941527
	47.162	3.477	0.362	2.815	45.548	0.038	0.061	99.464		18.2309	1.86995	0.109312	1.96896	13.9131	0.007168	0.008064	36.1079		0.944771
	47.315	3.406	0.57	2.773	45.968	0.044	0.038	100.119		18.1646	1.81933	0.170688	1.9264	13.9449	0.008512	0.004928	36.0434		0.914228
	47.291	3.447	0.65	2.821	46.105	0.036	0.054	100.413		18.1046	1.8359	0.193984	1.95462	13.9471	0.00672	0.007168	36.0573		0.904436
	47.38	3.515	0.369	2.835	45.715	0.074	0.08	99.973		18.2318	1.88205	0.111104	1.97389	13.9005	0.014336	0.010752	36.1285		0.944257
	47.153	3.551	0.744	2.827	45.882	0.019	0.059	100.243		18.0965	1.89638	0.223104	1.96358	13.9144	0.003584	0.007616	36.1115		0.894737
mean	47.2584	3.47556	0.476333	2.81711	45.7318	0.0393333	0.0598889	99.8617		18.1995	1.86214	0.143061	1.96319	13.9164	0.00751644	0.00791467	36.1022		0.92905
stdev	0.0858532	0.0471543	0.155503	0.0181827	0.227673	0.0207545	0.0126831	0.363732		0.0761009	0.0256899	0.0462146	0.016138	0.0198262	0.00396789	0.0017495	0.0349374		0.0212006

## Sheet: EA2
ELECTRONIC APPENDIX TABLE EA2
APATITE COMPOSITIONS IN LL CHONDRITES: ELECTRON MICROPROBE ANALYSES
													Formula based on 13 anions
Bo Xian	CaO	MgO	FeO	Na2O	P2O5	Y2O3	Ce2O3	F	Cl	-O=F,Cl	Total		Ca	Mg	Fe	Na	P	Y	Ce	F	Cl	Total	"Other" anion by diff
	54.358	0.097	0.325	0.426	40.742	0	0.026	0.54	4.205	1.176	99.543		5.10047	0.0126563	0.0237937	0.0723938	3.02079	0	0.00084375	0.149512	0.624206	9.00467	0.226281
	53.178	0.119	0.407	0.376	40.997	0	0.025	0.631	4.473	1.275	98.931		4.98741	0.015525	0.0298687	0.0637875	3.03834	0	0.00084375	0.174656	0.663694	8.97412	0.16165
	52.637	0.042	0.533	0.357	40.632	0	0.03	0.6	4.889	1.356	98.364		4.96142	0.00556875	0.03915	0.0609188	3.02636	0	0.0010125	0.166894	0.729	8.99049	0.104106
	52.569	0.051	0.26	0.394	40.765	0	0.024	0.595	4.948	1.368	98.238		4.95146	0.00675	0.0190687	0.0671625	3.03412	0	0.00084375	0.165375	0.737269	8.98206	0.0973563
	53.203	0.029	0.331	0.368	41.185	0.005	0.014	0.644	4.873	1.371	99.281		4.95973	0.0037125	0.0241312	0.0621	3.03379	0.00016875	0.00050625	0.177187	0.718706	8.98003	0.104106
	52.991	0.2	0.452	0.358	40.793	0	0.035	0.684	4.299	1.258	98.554		4.98977	0.0261562	0.0332437	0.0609188	3.03531	0	0.00118125	0.190181	0.640406	8.97716	0.169413
	53.921	0.086	0.537	0.386	41.042	0.005	0	0.666	3.936	1.168	99.411		5.05221	0.0111375	0.0393187	0.065475	3.03868	0.00016875	0	0.184106	0.583369	8.97463	0.232525
	52.982	0.053	0.4	0.352	41.138	0.002	0.064	0.735	4.705	1.371	99.06		4.9464	0.00691875	0.0291937	0.0594	3.0348	0.00016875	0.002025	0.2025	0.694913	8.97649	0.102587
	52.982	0.114	0.442	0.328	41.028	0	0.029	0.799	4.136	1.269	98.589		4.97576	0.01485	0.0324	0.0556875	3.04476	0	0.0010125	0.2214	0.614419	8.96046	0.164181
	52.756	0.054	0.401	0.335	41.404	0.032	0.044	0.737	4.622	1.353	99.032		4.9194	0.0070875	0.0291937	0.0565313	3.05083	0.00151875	0.00135	0.202838	0.68175	8.95067	0.115412
	52.759	0.064	0.491	0.356	41.283	0	0.025	0.768	4.542	1.348	98.94		4.92666	0.00826875	0.035775	0.060075	3.04611	0	0.00084375	0.211613	0.67095	8.96046	0.117437
	52.729	0.026	0.193	0.378	40.872	0	0.031	0.71	4.942	1.414	98.467		4.94573	0.003375	0.014175	0.064125	3.02923	0	0.0010125	0.196594	0.733219	8.98762	0.0701875
	52.875	0.012	0.296	0.349	40.427	0.035	0.007	0.603	5.044	1.392	98.256		4.98859	0.00151875	0.0217687	0.0595687	3.01388	0.0016875	0.00016875	0.167906	0.752794	9.00804	0.0793
Mean	53.0723	0.0728462	0.389846	0.366385	40.9468	0.00607692	0.0272308	0.670154	4.58569	1.31685	98.8205		4.97731	0.00950192	0.0285447	0.0621649	3.03438	0.000285577	0.000895673	0.185443	0.680361	8.97899	0.134196
1-sigma	0.518192	0.0506818	0.104709	0.0260849	0.274935	0.0123252	0.0159852	0.0768558	0.356419	0.0800394	0.440386		0.0502214	0.00662523	0.00766276	0.00449624	0.0101952	0.000590161	0.00050805	0.0209159	0.0533859	0.016488	0.0524028
													Formula based on 13 anions
Bjurbole	CaO	MgO	FeO	Na2O	P2O5	Y2O3	Ce2O3	F	Cl	-O=F,Cl	Total		Ca	Mg	Fe	Na	P	Y	Ce	F	Cl	Total	"Other" anion by diff
	53.538	0.033	0.144	0.338	40.032	0.037	0.031	0.368	5.496	1.395	98.622		5.027	0.0043	0.0106	0.0574	2.9702	0.0017	0.001	0.0951	0.7605	8.9278	0.1444
	53.178	0.017	0.184	0.362	40.564	0.018	0.037	0.628	5.287	1.457	98.818		4.9666	0.0022	0.0134	0.0612	2.9937	0.0008	0.0012	0.1609	0.7258	8.9258	0.1133
	53.755	0.044	0.203	0.349	40.693	0.02	0.046	0.585	4.626	1.29	99.031		4.9878	0.0057	0.0147	0.0586	2.9836	0.0009	0.0015	0.1501	0.6363	8.8393	0.2136
mean	53.4903	0.0313333	0.177	0.349667	40.4297	0.025	0.038	0.527	5.13633	1.38067	98.8237		4.9938	0.00406667	0.0129	0.0590667	2.9825	0.00113333	0.00123333	0.135367	0.707533	8.89763	0.1571
1-sigma	0.291438	0.0135769	0.0301164	0.0120139	0.350377	0.0104403	0.00754983	0.139366	0.454148	0.0844176	0.204559		0.0306438	0.00176163	0.00209523	0.00194251	0.0117886	0.000493288	0.000251661	0.0352876	0.0640833	0.050528	0.0513419
													Formula based on 13 anions
Tuxtuac	CaO	MgO	FeO	Na2O	P2O5	Y2O3	Ce2O3	F	Cl	-O=F,Cl	Total		Ca	Mg	Fe	Na	P	Y	Ce	F	Cl	Total	"Other" anion by diff
	54.068	0.014	0.505	0.435	41.233	0.016	0.041	1.139	3.979	1.378	100.052		4.9563	0.0017	0.0361	0.0721	2.9867	0.0007	0.0013	0.2879	0.5389	8.8818	0.1732
	54.296	0.015	0.498	0.405	41.115	0.006	0.007	1.065	3.445	1.225	99.627		4.9794	0.0019	0.0357	0.0671	2.9795	0.0003	0.0002	0.2711	0.4701	8.8053	0.2588
	53.9	0.003	0.086	0.398	41.287	0	0.017	0.996	4.411	1.414	99.684		4.9576	0.0003	0.0062	0.0662	3.0008	0	0.0005	0.2521	0.5982	8.8819	0.1497
	53.899	0.01	0.07	0.362	40.589	0	0.031	0.994	4.388	1.409	98.934		5.0094	0.0014	0.0051	0.0609	2.9809	0	0.001	0.2541	0.601	8.9138	0.1449
	53.793	0.015	0.496	0.419	40.644	0.005	0.018	0.888	4.414	1.37	99.322		4.9851	0.0019	0.0359	0.0703	2.9763	0.0002	0.0006	0.2269	0.6041	8.9013	0.169
	53.839	0.002	0.364	0.425	40.847	0	0.013	1.03	4.315	1.408	99.427		4.9773	0.0003	0.0263	0.071	2.984	0	0.0004	0.2619	0.5881	8.9093	0.15
	53.679	0.015	0.441	0.41	40.54	0.017	0.02	0.924	4.406	1.383	99.069		4.9879	0.002	0.032	0.069	2.9766	0.0008	0.0006	0.2363	0.6042	8.9094	0.1595
	53.821	0.003	0.415	0.433	40.756	0	0.013	0.941	4.377	1.384	99.375		4.9812	0.0003	0.03	0.0726	2.9806	0	0.0004	0.2399	0.5979	8.903	0.1622
	53.915	0.01	0.547	0.397	40.737	0	0.082	0.694	4.433	1.292	99.523		4.9836	0.0013	0.0395	0.0664	2.9754	0	0.0026	0.1774	0.6075	8.8537	0.2151
	53.509	0.021	0.537	0.398	40.682	0	0.072	0.654	4.551	1.302	99.122		4.9648	0.0028	0.0389	0.0669	2.9827	0	0.0023	0.1678	0.6256	8.8518	0.2066
	53.546	0.259	0.567	0.408	40.653	0	0.06	0.699	4.402	1.287	99.307		4.9558	0.0334	0.041	0.0683	2.9731	0	0.0019	0.1791	0.6041	8.8567	0.2168
	53.854	0.017	0.446	0.395	41.2	0	0.052	0.699	4.473	1.303	99.833		4.9498	0.0022	0.032	0.0657	2.9923	0	0.0016	0.1777	0.6094	8.8308	0.2129
	53.994	0.018	0.2	0.399	41.233	0.001	0.077	0.864	4.13	1.296	99.62		4.9615	0.0023	0.0143	0.0663	2.994	0.0001	0.0024	0.2197	0.5628	8.8235	0.2175
	54.021	0.024	0.231	0.359	41.008	0	0.033	0.715	4.479	1.312	99.558		4.9803	0.0031	0.0166	0.0599	2.9874	0	0.001	0.1822	0.6118	8.8424	0.206
	53.67	0.014	0.418	0.406	41.226	0	0.079	0.839	4.308	1.325	99.635		4.9378	0.0018	0.03	0.0677	2.9971	0	0.0025	0.2132	0.5868	8.8369	0.2
	53.874	0.02	0.348	0.381	40.525	0	0.054	0.733	4.374	1.296	99.013		5.003	0.0026	0.0252	0.064	2.9738	0	0.0017	0.1883	0.602	8.8606	0.2097
	53.846	0.006	0.189	0.418	40.7	0	0.085	0.67	4.561	1.311	99.164		4.9922	0.0007	0.0137	0.0701	2.9817	0	0.0027	0.1716	0.6262	8.8589	0.2022
	54.038	0.015	0.183	0.394	40.839	0	0.042	0.772	4.531	1.348	99.466		4.994	0.0019	0.0132	0.0659	2.9824	0	0.0013	0.1968	0.6192	8.8747	0.184
	53.914	0	0.138	0.369	41.138	0.026	0.022	0.79	4.672	1.387	99.682		4.968	0	0.0099	0.0615	2.9954	0.0012	0.0007	0.2004	0.6355	8.8727	0.1641
	53.984	0.01	0.16	0.379	40.988	0	0	0.791	4.602	1.372	99.542		4.9824	0.0013	0.0115	0.0633	2.9892	0	0	0.2012	0.6274	8.8763	0.1714
	54.202	0.005	0.356	0.353	40.885	0	0	0.755	4.514	1.337	99.733		4.9974	0.0007	0.0256	0.0589	2.9787	0	0	0.1922	0.6158	8.8693	0.192
	54.284	0.005	0.265	0.361	40.904	0	0.016	0.819	4.359	1.329	99.684		5.0027	0.0006	0.0191	0.0602	2.9787	0	0.0005	0.2084	0.5947	8.8649	0.1969
	53.857	0	0.227	0.413	40.874	0.025	0	1.018	4.205	1.378	99.241		4.9804	0	0.0164	0.0691	2.9868	0.0011	0	0.2593	0.5741	8.8872	0.1666
	53.756	0	0.284	0.404	40.825	0.028	0	1.025	4.298	1.402	99.218		4.977	0	0.0205	0.0678	2.9867	0.0013	0	0.2612	0.5868	8.9014	0.152
	53.628	0	0.366	0.405	40.957	0.016	0.016	0.817	4.536	1.368	99.373		4.9579	0	0.0264	0.0678	2.992	0.0007	0.0005	0.2082	0.6195	8.873	0.1723
	53.777	0	0.346	0.408	41.203	0.01	0	0.816	4.443	1.347	99.656		4.9493	0	0.0249	0.0679	2.9965	0.0004	0	0.2073	0.6049	8.8512	0.1878
average	53.8832	0.0192692	0.333962	0.397462	40.9072	0.00576923	0.0326923	0.851808	4.36946	1.34473	99.4562		4.97585	0.00248077	0.0240769	0.0664192	2.98497	0.000261538	0.00102692	0.217008	0.596792	8.86892	0.1862
stdev	0.198509	0.0494599	0.148943	0.0224966	0.238763	0.00934369	0.0287232	0.138064	0.23934	0.0476777	0.2722		0.0186806	0.0063806	0.0107454	0.00376617	0.00781627	0.000423393	0.000909751	0.0347546	0.0332479	0.0281438	0.0277517
													Formula based on 13 anions
St Severin	CaO	MgO	FeO	Na2O	P2O5	Y2O3	Ce2O3	F	Cl	-O=F,Cl	Total		Ca	Mg	Fe	Na	P	Y	Ce	F	Cl	Total	"Other" anion by diff
	54.497	0.012	0.114	0.313	41.088	0.008	0.069	0.834	4.645	1.399	100.181		5.0053	0.0016	0.0082	0.0519	2.982	0.0004	0.0022	0.2108	0.6295	8.892	0.1597
	54.288	0.012	0.1	0.287	40.829	0	0.062	0.531	5.035	1.36	99.784		5.0143	0.0015	0.0072	0.048	2.98	0	0.0019	0.1351	0.6873	8.8753	0.1776
	54.187	0.015	0.182	0.298	40.832	0	0.045	0.592	5.021	1.382	99.79		5.0059	0.002	0.0132	0.0498	2.9807	0	0.0014	0.1506	0.6847	8.8883	0.1647
	54.723	0.01	0.614	0.274	41.294	0.03	0.033	1.172	3.918	1.377	100.691		4.9901	0.0013	0.0437	0.0452	2.9755	0.0013	0.001	0.2947	0.528	8.8808	0.1773
	54.488	0.015	0.352	0.28	40.766	0.017	0.007	0.491	4.954	1.325	100.045		5.0234	0.0019	0.0253	0.0467	2.9698	0.0008	0.0002	0.1249	0.6762	8.8692	0.1989
	54.157	0.005	0.532	0.277	41.056	0.02	0.026	0.618	5.076	1.406	100.361		4.979	0.0007	0.0382	0.0461	2.9826	0.0009	0.0008	0.1564	0.6884	8.8931	0.1552
	54.585	0.003	0.077	0.297	41.285	0	0.037	0.815	4.543	1.368	100.274		4.9988	0.0003	0.0055	0.0493	2.9876	0	0.0012	0.2058	0.6149	8.8635	0.1793
	53.443	0.438	1.187	0.23	40.409	0.01	0.043	0.83	4.283	1.316	99.557		4.9469	0.0564	0.0858	0.0385	2.9556	0.0005	0.0014	0.2124	0.587	8.8846	0.2006
	54.766	0.035	0.975	0.318	41.313	0	0.021	0.928	3.739	1.235	100.86		4.9792	0.0044	0.0692	0.0523	2.968	0	0.0006	0.2344	0.5059	8.814	0.2597
average	54.3482	0.0605556	0.459222	0.286	40.9858	0.00944444	0.0381111	0.756778	4.57933	1.352	100.171		4.99366	0.00778889	0.0329222	0.0475333	2.97576	0.000433333	0.00118889	0.191678	0.622433	8.87342	0.185889
stdev	0.379817	0.133724	0.381168	0.0245312	0.286005	0.0102752	0.0183512	0.206684	0.474543	0.050204	0.405481		0.0217189	0.0172208	0.0273415	0.0039449	0.00925276	0.000454606	0.000589622	0.0516672	0.0659858	0.0230552	0.0299932
